# Supplementary material for: Examining the quality of care across the continuum of maternal care (antenatal, perinatal and postnatal care) under the expanded free maternity policy (Linda Mama Policy) in Kenya: a mixed-methods study
Source: PubMed Central journal article supplement (PMC11086406; doi:10.1136/bmjopen-2023-082011), 2024-05-02
Supplement: bmjopen-2023-082011supp001.pdf [file bmjopen-2023-082011supp001.pdf]

## Appendix 1: Maternal healthcare access characteristics

| Variable                                          |                                    | Total Frequency (%)<br>n=550 | Hospital A<br>n (%)<br>n=42 | Hospital B<br>n (%)<br>n=170 | Hospital C<br>n (%)<br>n=338 | p-value            |
|---------------------------------------------------|------------------------------------|------------------------------|-----------------------------|------------------------------|------------------------------|--------------------|
| Facility visited during pregnancy                 | Yes                                | 545 (99.09)                  | 42 (100)                    | 169 (99.41)                  | 334 (98.82)                  | 0.650              |
|                                                   | No                                 | 5 (0.91)                     | 0                           | 1 (0.59)                     | 4 (1.18)                     |                    |
| Type of facility visited                          | Public facility                    | 506 (92.00)                  | 38 (90.48)                  | 149 (87.65)                  | 319 (94.38)                  | <b>P&lt;0.001*</b> |
|                                                   | Private facility                   | 28 (5.09)                    | 1 (2.38)                    | 17 (10.00)                   | 10 (2.96)                    |                    |
|                                                   | Faith based organization (Mission) | 7 (1.27)                     | -                           | 3 (1.76)                     | 4 (1.18)                     |                    |
|                                                   | Other                              | 9 (1.64)                     | 3 (7.14)                    | 1 (0.59)                     | 5 (1.48)                     |                    |
| Time taken to reach hospital                      | Below 30 minutes                   | 137 (24.91)                  | 12 (28.57)                  | 45 (26.47)                   | 80 (23.67)                   | 0.309              |
|                                                   | 30 minutes-1 hour                  | 264 (48.00)                  | 19 (45.24)                  | 87 (51.18)                   | 158 (46.75)                  |                    |
|                                                   | 1 hour-2 hours                     | 121 (22.00)                  | 7 (16.67)                   | 35 (20.59)                   | 79 (23.37)                   |                    |
|                                                   | More than 2 hours                  | 20 (3.64)                    | 4 (9.52)                    | 2 (1.18)                     | 14 (4.14)                    |                    |
|                                                   | Don't know                         | 8 (1.45)                     | -                           | 1(0.59)                      | 7 (1.96)                     |                    |
| Perception of the time take to reach the hospital | Very short                         | 60 (10.91)                   | 6 (14.29)                   | 25 (14.71)                   | 29 (8.58)                    | 0.340              |
|                                                   | Short                              | 249 (45.27)                  | 18 (42.86)                  | 73 (42.94)                   | 158 (46.75)                  |                    |
|                                                   | Normal                             | 99 (18.00)                   | 12 (28.57)                  | 32 (18.82)                   | 55 (16.27)                   |                    |
|                                                   | Long                               | 107 (19.45)                  | 5 (11.90)                   | 29 (17.06)                   | 73 (21.60)                   |                    |
|                                                   | Very long                          | 32 (5.82)                    | 1 (2.38)                    | 11 (6.47)                    | 20 (5.92)                    |                    |
|                                                   | Don't know                         | 3 (0.54)                     | -                           | -                            | 3 (0.89)                     |                    |
|                                                   | Very near                          | 69 (12.55)                   | 16 (38.10)                  | 22 (12.94)                   | 31 (9.17)                    | <b>P&lt;0.001</b>  |

| Variable                                  |                                   | Total Frequency (%)<br>n=550 | Hospital A<br>n (%)<br>n=42 | Hospital B<br>n (%)<br>n=170 | Hospital C<br>n (%)<br>n=338 | p-value           |
|-------------------------------------------|-----------------------------------|------------------------------|-----------------------------|------------------------------|------------------------------|-------------------|
| Perception about distance to the facility | Normal                            | 339 (61.64)                  | 17 (40.48)                  | 107 (62.94)                  | 215 (63.61)                  |                   |
|                                           | Far                               | 110 (20.00)                  | 8 (19.05)                   | 33 (19.41)                   | 69 (20.41)                   |                   |
|                                           | Very far                          | 28 (5.09)                    | -                           | 8 (4.71)                     | 20 (5.92)                    |                   |
|                                           | Don't know                        | 4 (0.73)                     | 1 (2.38)                    | -                            | 3 (0.89)                     |                   |
| Means of transport to the facility        | Walking                           | 27 (4.91)                    | 7 (16.67)                   | 14 (8.24)                    | 6 (1.78)                     | <b>P&lt;0.001</b> |
|                                           | Bi/Motorcycle                     | 60 (10.91)                   | 1 (2.38)                    | 20 (11.76)                   | 39 (11.54)                   |                   |
|                                           | Public transport (matatu/tuk tuk) | 224 (40.73)                  | 8 (19.05)                   | 55 (32.35)                   | 161 (47.63)                  |                   |
|                                           | Private car/taxi                  | 211 (38.36)                  | 24 (57.14)                  | 78 (45.88)                   | 109 (32.25)                  |                   |
|                                           | Ambulance                         | 22 (4.00)                    | -                           | 1 (0.59)                     | 21 (6.21)                    |                   |
|                                           | Combined modes                    | 6 (1.09)                     | 2 (4.76)                    | 2 (1.18)                     | 2 (0.59)                     |                   |
| Does opening hour suit your time?         | Yes                               | 431 (78.36)                  | 41 (97.62)                  | 152 (89.41)                  | 238 (70.41)                  | <b>P&lt;0.001</b> |
|                                           | No                                | 9 (1.64)                     | 1 (2.38)                    | 1 (0.59)                     | 7 (2.07)                     |                   |
|                                           | Don't know                        | 76 (13.82)                   | -                           | 15 (8.82)                    | 61 (18.05)                   |                   |
|                                           | N/A                               | 34 (6.18)                    | -                           | 2 (1.18)                     | 32 (9.47)                    |                   |
| Waiting time at the facility              | Very short                        | 80 (14.55)                   | 12 (28.57)                  | 26 (15.29)                   | 42 (12.43)                   | <b>P&lt;0.001</b> |
|                                           | Short                             | 237 (43.09)                  | 16 (38.10)                  | 72 (42.35)                   | 149 (44.08)                  |                   |
|                                           | Normal                            | 70 (12.73)                   | 11 (26.19)                  | 28 (16.47)                   | 31 (9.17)                    |                   |
|                                           | Long                              | 80 (14.55)                   | 1 (2.38)                    | 22 (12.94)                   | 57 (16.86)                   |                   |
|                                           | Very long                         | 43 (7.82)                    | 2 (4.76)                    | 22 (12.94)                   | 19 (5.62)                    |                   |
|                                           | N/A                               | 40 (7.27)                    | -                           | -                            | 40 (11.83)                   |                   |

| Variable                            |            | Total Frequency (%)<br>n=550 | Hospital A<br>n (%)<br>n=42 | Hospital B<br>n (%)<br>n=170 | Hospital C<br>n (%)<br>n=338 | p-value      |
|-------------------------------------|------------|------------------------------|-----------------------------|------------------------------|------------------------------|--------------|
| Hospital have a proper waiting area | Yes        | 422 (76.73)                  | 40 (95.24)                  | 134 (78.82)                  | 248 (73.37)                  | <b>0.005</b> |
|                                     | No         | 85 (15.45)                   | 1 (2.38)                    | 29 (17.06)                   | 55 (16.27)                   |              |
|                                     | Don't know | 28 (5.09)                    | 1 (2.38)                    | 7 (4.12)                     | 20 (5.92)                    |              |
|                                     | N/A        | 15(2.73)                     | -                           | -                            | 15 (4.44)                    |              |

**Note:** Chi square test of proportion was used to test difference in overall proportions of maternal health access characteristics.

\*There is a statistical difference in the type of facilities that the mothers visited (majority visited public facilities).

**Bold means p-value <0.05**

Appendix 2: Referral characteristics

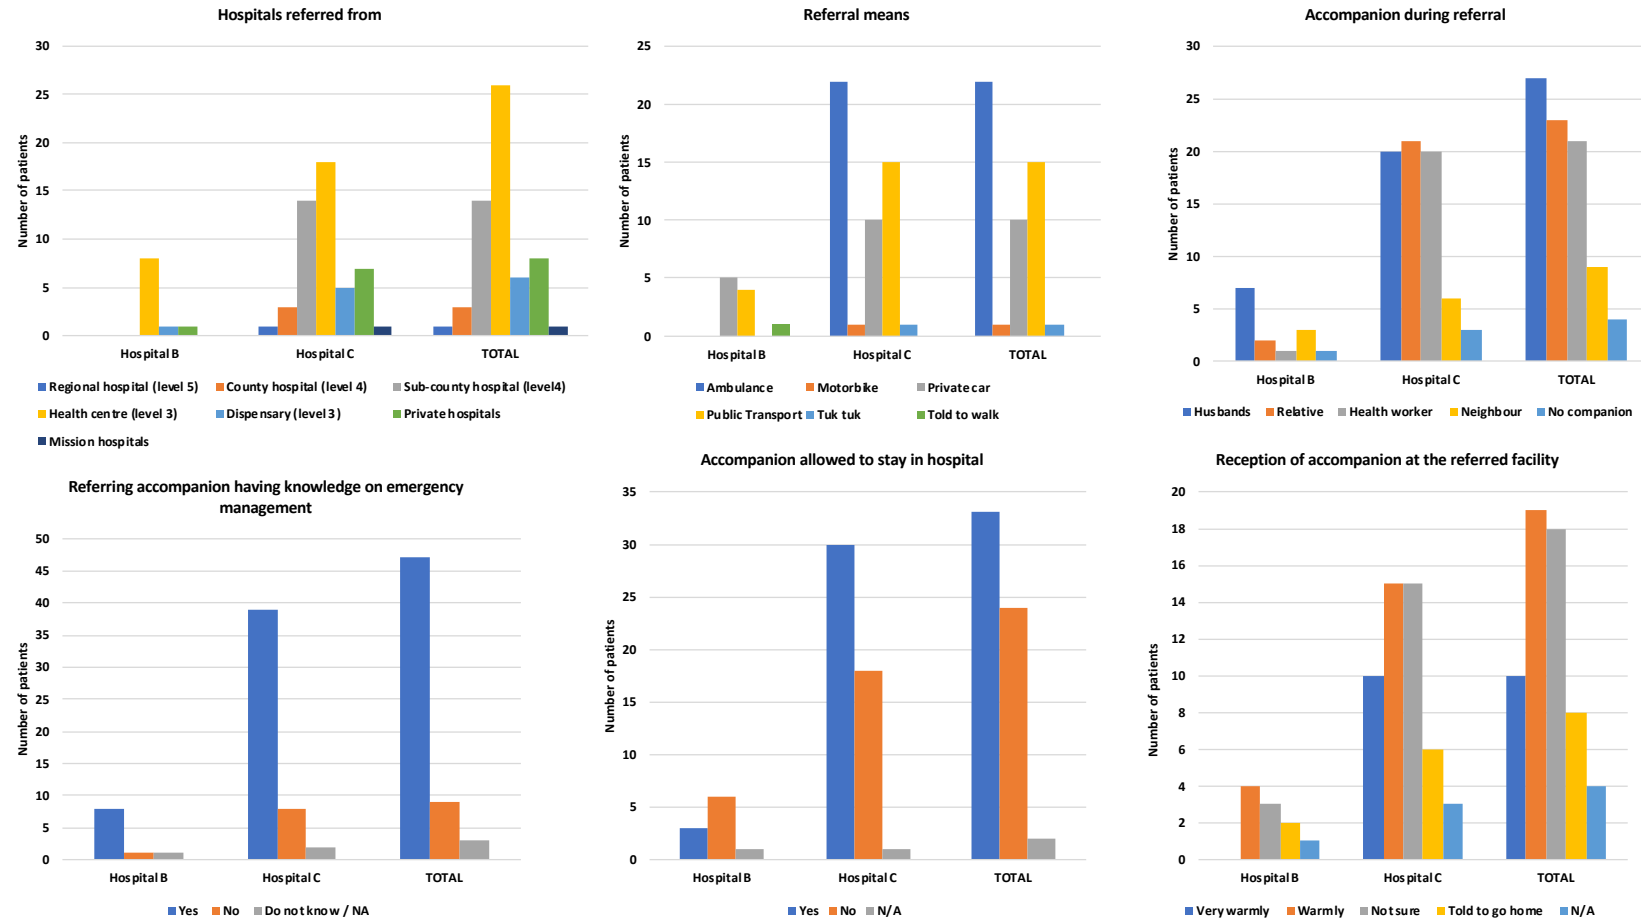

## Appendix 3: Reasons for referral

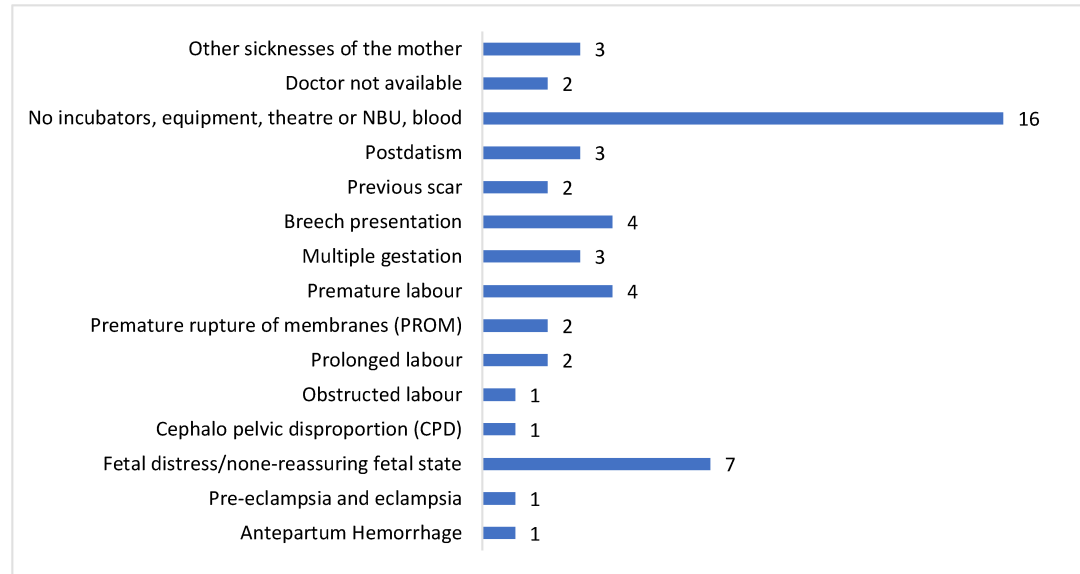

## Appendix 4: Perception of quality of maternal care from the mothers exit interviews

| <b>Health Facility</b>                                          | <b>Completely Disagree</b> | <b>Disagree</b> | <b>Not Sure</b> | <b>Agree</b> | <b>Completely Agree</b> |
|-----------------------------------------------------------------|----------------------------|-----------------|-----------------|--------------|-------------------------|
| Number of staff adequate                                        | 0.73%                      | 19.09%          | 3.82%           | 57.82%       | 18.55%                  |
| Staff well suited to treat women                                | 0.36%                      | 1.82%           | 1.27%           | 70.73%       | 25.82%                  |
| Waiting and examination rooms adequate                          | 5.82%                      | 38.73%          | 3.82%           | 40.55%       | 11.05%                  |
| Provision of clean drinking water adequate                      | 3.82%                      | 38.36%          | 11.46%          | 34.00%       | 12.18%                  |
| Hand washing facilities adequate                                | 1.45%                      | 6.00%           | 0.73%           | 70.55%       | 21.27%                  |
| Bathing facilities adequate                                     | 3.82%                      | 24.36%          | 4.36%           | 52.91%       | 14.55%                  |
| Toilet facilities adequate                                      | 2.91%                      | 24.00%          | 1.64%           | 55.45%       | 16.00%                  |
| Overall facility environment very clean                         | 0.91%                      | 3.64%           | 2.00%           | 70.00%       | 23.45%                  |
| Well suited equipment for detecting women's problems            | 0.91%                      | 3.45%           | 4.73%           | 69.82%       | 21.09%                  |
| Distance from home very far                                     | 8.55%                      | 59.09%          | 2.18%           | 23.82%       | 6.36%                   |
| <b>Healthcare delivery</b>                                      | <b>Completely Disagree</b> | <b>Disagree</b> | <b>Not Sure</b> | <b>Agree</b> | <b>Completely Agree</b> |
| Staff examine pregnant and post partum women well               | 0.91%                      | 2.00%           | 1.82%           | 72.00%       | 23.27%                  |
| Staff very capable of finding out what is wrong with patients   | 0.73%                      | 1.64%           | 2.18%           | 71.09%       | 24.36%                  |
| Staff prescribe drugs that are needed                           | 0.00%                      | 2.91%           | 37.45%          | 42.91%       | 16.73%                  |
| Drugs supplied by health facility are good                      | 0.36%                      | 1.45%           | 39.82%          | 42.55%       | 15.82%                  |
| Patients can obtain drugs from health facility easily           | 1.45%                      | 5.64%           | 25.64%          | 52.00%       | 15.27%                  |
| Facility provided privacy very much during VE and delivery      | 3.82%                      | 9.64%           | 6.73%           | 63.82%       | 16.00%                  |
| Felt very much of necessary procedure during ANC and delivery   | 3.83%                      | 8.38%           | 3.10%           | 65.39%       | 19.31%                  |
| Adequate Information on danger signs of delivery and postpartum | 1.45%                      | 0.24%           | 3.27%           | 49.45%       | 21.82%                  |
| <b>Interpersonal Aspects</b>                                    | <b>Completely Disagree</b> | <b>Disagree</b> | <b>Not Sure</b> | <b>Agree</b> | <b>Completely Agree</b> |
| Staff very open with the patients                               | 0.18%                      | 3.83%           | 1.64%           | 68.61%       | 25.73%                  |
| Staff very compassionate towards the patients                   | 1.27%                      | 5.45%           | 2.73%           | 66.00%       | 24.58%                  |

|                                               |       |       |       |        |        |
|-----------------------------------------------|-------|-------|-------|--------|--------|
| Staff are respectful towards the patients     | 0.18% | 2.73% | 1.64% | 69.64% | 25.82% |
| Time staff devete to the patients is adequate | 0.36% | 4.36% | 1.09% | 67.27% | 26.91% |
| Staff are very honest                         | 0.00% | 2.36% | 5.64% | 65.64% | 26.36% |
